# Supplementary material for: Haze Occurrence Caused by High Gas-to-Particle Conversion in Moisture Air under Low Pollutant Emission in a Megacity of China
Source: Int J Environ Res Public Health. 2022 May 25;19(11):6405. doi: 10.3390/ijerph19116405 (PMC9179953; doi:10.3390/ijerph19116405)
Supplement: Supplementary file 1 [file ijerph-19-06405-s001.zip › ijerph-1695979-supplementary.pdf]

### Supplementary Materials:

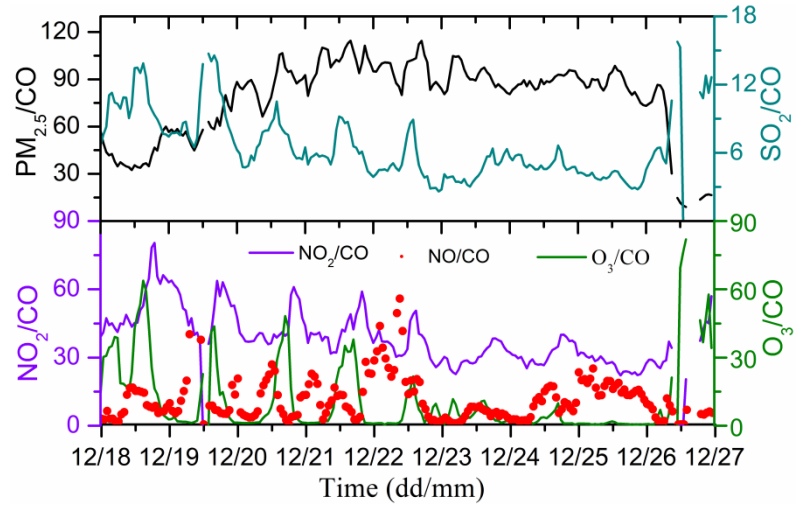

**Figure S1.** Time series of PM<sub>2.5</sub> and gaseous pollutants (NO, NO<sub>2</sub>, SO<sub>2</sub>, CO and O<sub>3</sub>) in the three periods.

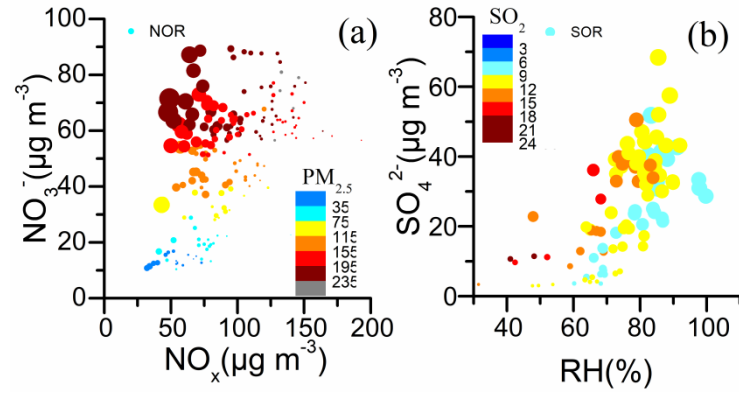

**Figure S2.** Correlations between NO<sub>3</sub><sup>-</sup> and NO<sub>x</sub>, SO<sub>4</sub><sup>2-</sup> and RH. Symbols in (a) are scaled by NOR, and colored by PM<sub>2.5</sub> concentration; Symbols in (b) are scaled by SOR concentration, and colored by SO<sub>2</sub>.

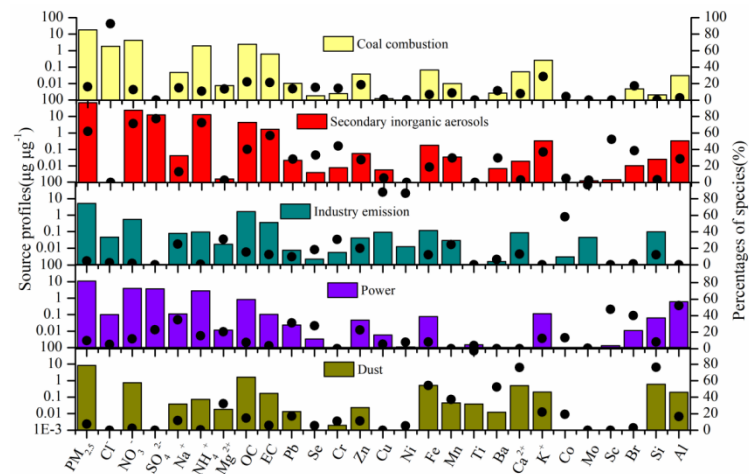

**Figure S3.** Profiles of four sources profiles (bars) resolved from the PMF model (in units of µg µg<sup>-1</sup>) and contribution percentages (black dots) from each source factor.
